# Supplementary material for: A Preliminary Study of the Value of Personality Assessment in Medical School Admissions within the United States
Source: Research Square preprint supplement (doi:10.21203/rs.3.rs-1429390/v1), 2022-03-16
Supplement: Supplementary file 1 [file 6afd4f6941bfe8974f90c5b3.docx]

**Table 3: Enumeration of Various Assessments**

1. Assessment and Course Grading. Assessments are outcomes based so that learners and faculty can evaluate progress in the development of competencies expected for the course. Some scores will be earned individually, some scores will be earned as a team. It is the student’s responsibility to read the Student Assessment Handbook and familiarize themselves with the policies, regulations and procedures regarding assessments and evaluations.

|  | **When** | **%** | **No lab** |
| --- | --- | --- | --- |
| iRAT/tRAT quiz (*participation*) | Start of Flipped Class | 5 | 10 |
| Student Case Presentations | Fridays | 10 | 10 |
| Lab Practical OSPE | End of course | 15 |  |
| End of course MCQ | End of course | 40 | 45 |
| NBME MCQ Exam (internally scaled score) | End of course | 20 | 25 |
| Peer evaluation* (3%)  Attendance (3%)  Completion of course/faculty evaluations (4%) | End of course | 10 | 10 |

2. iRAT/tRAT quizzes. These questions (in USMLE Step 1 format) are based on the pre-assigned material for flipped classroom sessions; two questions are set from each session. The scores from the RAT quizzes during the course provide students with an indication of how they are progressing in the course (and serve as feedback) as well as identifying topics and concepts that may require additional study. The participation earned in the quizzes contribute to the final grade in the course.

3. Multiple Choice Exam (MCQ). This examination is administered during the exam week at the end of the course. The number of questions depends on the duration of the course. Questions are in USMLE Step 1 format. The exam covers all material presented during the course, and the make-up of the exam reflects the weight that each discipline contributed to the course.

4. NBME Standardized tests. There is an NBME test during the exam week. The test contains 75 questions and examines material learned during the course. The standard of the questions in the exam is based on USMLE Step 1 and provides students an opportunity to assess their preparation for the Step 1 exam. Performance in the NBME exam is internally scaled to account for variability in exam difficulty (NBME exam difficulty does vary between test versions).

5. Practice Lab practical exam.

a. Mock/Practice Lab Practical Examination: There is an optional laboratory practical examination during the last week of the course that covers all laboratory material studied (anatomy, physiology, histology, pathology, microbiology).

b. End-of-course Lab Practical Examination: There is a lab practical examination (objective structured lab exam OSPE) at the end of the course that covers all the laboratory material learned during the course (anatomy, physiology, histology, pathology, microbiology).

6. Clinical case presentation. Students are assessed by instructors who facilitate the clinical presentations, using rubric-based evaluation forms. The scores from certain presentations contribute towards the final course grade. The scores from certain presentations contribute towards the final course grade.

7. Other Assessments.

a. Peer Evaluation. Students evaluate their team members using a peer-to-peer evaluation form. Peer evaluation occurs twice during the course: the first evaluation during the course, the second occurs during the last week of the course.

b. Attendance. One element of the peer evaluation is to collect information relating to attendance during the course. This contributes to the final grade.

c. Course/Faculty Evaluation. Students are required to provide feedback regarding the course and faculty teaching. Students will receive and must complete a survey evaluating the course and faculty teaching in the course. Non-compliance reduces the grade assigned to this category.

In addition independent of overall Course grade is a measurement termed **OSCE** (also mentioned in the list of metrics provided previously): Objective Structured Clinical Exam. This is where standardized patients are used to assess clinical encounters. This is included as an additional independent.
